# Supplementary material for: Association between Urinary Calcium Excretion and Estimated Glomerular Filtration Rate Decline in Patients with Type 2 Diabetes Mellitus: A Retrospective Single-center Observational Study
Source: MDPI journal article supplement (doi:10.3390/jcm7070171), 2018-07-10
Supplement: s1 [file s1]

**Supplementary Materials: Association between Urinary Calcium Excretion and Estimated Glomerular Filtration Rate Decline in Patients with Type 2 Diabetes Mellitus: A Retrospective Single-center Observational Study**

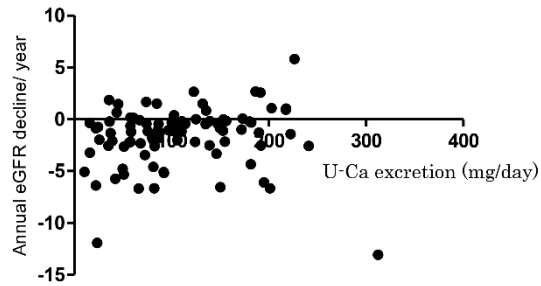

**Figure S1.** Correlation between Correlation of urinary calcium excretion (U-Ca) and the decline in the slope of eGFR in all patients ( $p = 0.05$ ,  $r = 0.200$ ).
